# Supplementary material
Source: HighWire-hosted journal article supplement (https://heart.bmj.com/content/103/10/783)
Supplement: inline-supplementary-material-1 [file inline-supplementary-material-1.pdf]

**Supplemental Table 1 Association of tea consumption with risk of IHD by sex. Values are HRs (95% CIs) unless stated otherwise. \***

| Endpoints                      | Never † | Less than daily  | Daily (grams/day) |                  |                  |                  | All              | P for trend† |
|--------------------------------|---------|------------------|-------------------|------------------|------------------|------------------|------------------|--------------|
|                                |         |                  | 0.1 - 2.0         | 2.1 - 3.0        | 3.1 - 5.0        | >5.0             |                  |              |
| <b>Men</b>                     |         |                  |                   |                  |                  |                  |                  |              |
| <b>IHD</b>                     |         |                  |                   |                  |                  |                  |                  |              |
| No. of person years            | 263,181 | 547,268          | 183,892           | 87,699           | 137,022          | 167,979          | 576,592          |              |
| No. of cases                   | 2,618   | 3,664            | 1,272             | 606              | 981              | 1,161            | 4,020            |              |
| Cases/person-years<br>(1/1000) | 9.95    | 6.7              | 6.92              | 6.91             | 7.16             | 6.91             | 6.97             |              |
| Model 1                        | 1.00    | 0.95 (0.90,1.00) | 0.94 (0.88,1.02)  | 0.91 (0.83,1.01) | 0.95 (0.88,1.02) | 0.97 (0.90,1.04) | 0.95 (0.90,1.00) | 0.263        |
| Model 2                        | 1.00    | 0.96 (0.91,1.01) | 0.94 (0.87,1.01)  | 0.91 (0.83,1.01) | 0.93 (0.86,1.01) | 0.93 (0.86,1.00) | 0.93 (0.88,0.99) | 0.678        |
| Model 3                        | 1.00    | 0.95 (0.90,1.00) | 0.93 (0.86,1.00)  | 0.89 (0.81,0.98) | 0.91 (0.84,0.98) | 0.90 (0.84,0.97) | 0.91 (0.86,0.96) | 0.967        |
| <b>MCE</b>                     |         |                  |                   |                  |                  |                  |                  |              |
| No. of person years            | 269,668 | 556,518          | 186,949           | 89,006           | 139,506          | 170,912          | 586,373          |              |
| No. of cases                   | 618     | 710              | 272               | 176              | 200              | 255              | 903              |              |
| Cases/person-years<br>(1/1000) | 2.29    | 1.28             | 1.45              | 1.98             | 1.43             | 1.49             | 1.54             |              |
| Model 1                        | 1.00    | 0.83 (0.74,0.93) | 0.77 (0.65,0.90)  | 0.93 (0.77,1.13) | 0.82 (0.69,0.98) | 0.97 (0.83,1.14) | 0.86 (0.76,0.98) | 0.066        |
| Model 2                        | 1.00    | 0.87 (0.77,0.98) | 0.78 (0.66,0.92)  | 0.97 (0.80,1.17) | 0.83 (0.70,0.99) | 0.94 (0.80,1.11) | 0.87 (0.76,0.98) | 0.288        |
| Model 3                        | 1.00    | 0.87 (0.77,0.97) | 0.77 (0.66,0.91)  | 0.96 (0.79,1.16) | 0.82 (0.69,0.97) | 0.92 (0.78,1.08) | 0.85 (0.75,0.97) | 0.418        |
| <b>Women</b>                   |         |                  |                   |                  |                  |                  |                  |              |
| <b>IHD</b>                     |         |                  |                   |                  |                  |                  |                  |              |
| No. of person years            | 933,982 | 782,798          | 159,272           | 67,310           | 55,477           | 43,527           | 325,586          |              |
| No. of cases                   | 7,395   | 4,602            | 1,135             | 506              | 417              | 308              | 2,366            |              |

| Endpoints                      | Never † | Less than daily  | Daily (grams/day) |                  |                  |                  | All               | P for trend† |
|--------------------------------|---------|------------------|-------------------|------------------|------------------|------------------|-------------------|--------------|
|                                |         |                  | 0.1 - 2.0         | 2.1 - 3.0        | 3.1 - 5.0        | >5.0             |                   |              |
| Cases/person-years<br>(1/1000) | 7.92    | 5.88             | 7.13              | 7.52             | 7.52             | 7.08             | 7.27              |              |
| Model 1                        | 1.00    | 0.97 (0.94,1.01) | 0.91 (0.85,0.98)  | 0.90 (0.81,1.00) | 0.91 (0.82,1.01) | 0.86 (0.77,0.97) | 0.90 (0.85,0.96)  | 0.139        |
| Model 2                        | 1.00    | 0.99 (0.95,1.03) | 0.91 (0.85,0.98)  | 0.91 (0.82,1.01) | 0.92 (0.82,1.02) | 0.87 (0.77,0.98) | 0.91 (0.85,0.96)  | 0.132        |
| Model 3                        | 1.00    | 0.97 (0.93,1.01) | 0.88 (0.82,0.95)  | 0.89 (0.80,0.99) | 0.88 (0.79,0.97) | 0.83 (0.73,0.93) | 0.87 (0.82,0.93)  | 0.063        |
| <b>MCE</b>                     |         |                  |                   |                  |                  |                  |                   |              |
| No. of person years            | 954,892 | 795,431          | 162,258           | 68,559           | 56,560           | 44,338           | 331,715           |              |
| No. of cases                   | 900     | 482              | 161               | 88               | 56               | 41               | 346               |              |
| Cases/person-years<br>(1/1000) | 0.94    | 0.61             | 0.99              | 1.28             | 0.99             | 0.92             | 1.04              |              |
| Model 1                        | 1.00    | 0.95 (0.85,1.07) | 0.98 (0.80,1.19)  | 1.04 (0.80,1.34) | 0.99 (0.74,1.32) | 1.03 (0.74,1.43) | 1.00 (0.85,1.18)  | 0.673        |
| Model 2                        | 1.00    | 1.02 (0.90,1.15) | 1.02 (0.83,1.25)  | 1.08 (0.83,1.40) | 1.05 (0.79,1.40) | 1.08 (0.77,1.50) | 1.04 (0.88,1.23)  | 0.817        |
| Model 3                        | 1.00    | 0.98 (0.87,1.11) | 0.95 (0.78,1.17)  | 1.04 (0.80,1.35) | 1.00 (0.75,1.33) | 1.00 (0.71,1.39) | 0.98 (0.83, 1.16) | 0.814        |

\* Multivariate models were adjusted for: model 1: age (years); model 2: additionally included sex (male or female); level of education (no formal school, primary school, middle school, high school, college, or university or higher); marital status (married, widowed, divorced or separated, or never married); alcohol consumption (never; occasional; former and having quitted  $\leq 2$ , 3-4, or  $\geq 5$  years; weekly consuming 1-286, 287-426, or  $\geq 427$  g of alcohol for men or 1-146, 147-286, or  $\geq 287$  g of alcohol for women); smoking status (never; occasional; former and having quitted  $\leq 2$ , 3-4, 5-9, 10-19, or  $\geq 20$  years; current smoking 1-4, 5-9, 10-14, 15-19, 20-24, or  $\geq 25$  cigarettes/day); physical activity (MET h/day); intake frequencies of red meat, fruits, and vegetables (daily, 4 to 6 days/wk, 1 to 3 days/wk, monthly, or rarely or never); family history heart attack (presence, absence, or unknown); menopausal status (for women only, premenopausal, perimenopausal, or postmenopausal); model 3: additionally included body mass index; prevalent hypertension and diabetes at baseline (presence or absence).

† Tests for linear trend were only conducted in daily consumers by modeling the amount of tea consumption (in gram/day) as a variable in regression models.

**Supplemental Table 2 Association of tea consumption (in cup/day) with the risk of IHD among 487,375 participants. Values are HRs (95% CIs) unless stated otherwise. \***

| Endpoints                      | Never     | Less than daily  | Daily (cups/day) |                  |                  |                  | All              | P for trend† |
|--------------------------------|-----------|------------------|------------------|------------------|------------------|------------------|------------------|--------------|
|                                |           |                  | 1 - 2            | 3 - 4            | 5 - 6            | ≥7               |                  |              |
| <b>IHD</b>                     |           |                  |                  |                  |                  |                  |                  |              |
| No. of person years            | 1,197,163 | 1,330,065        | 219,369          | 321,684          | 202,610          | 158,516          | 902,178          |              |
| No. of cases                   | 10,013    | 8,266            | 1818             | 2,413            | 1,184            | 971              | 6,386            |              |
| Cases/person-years<br>(1/1000) | 8.36      | 6.21             | 8.29             | 7.5              | 5.84             | 6.13             | 7.08             |              |
| Model 1                        | 1.00      | 0.97 (0.94,1.00) | 0.96 (0.90,1.01) | 0.95 (0.90,1.00) | 0.92 (0.86,0.98) | 0.98 (0.92,1.06) | 0.95 (0.92,0.98) | 0.105        |
| Model 2                        | 1.00      | 0.98 (0.95,1.02) | 0.96 (0.91,1.01) | 0.95 (0.90,1.00) | 0.91 (0.85,0.97) | 0.96 (0.89,1.03) | 0.95 (0.91,0.98) | 0.334        |
| Model 3                        | 1.00      | 0.97 (0.93,1.00) | 0.94 (0.89,1.00) | 0.92 (0.88,0.97) | 0.87 (0.82,0.93) | 0.91 (0.85,0.98) | 0.92 (0.88,0.95) | 0.682        |
| <b>MCE</b>                     |           |                  |                  |                  |                  |                  |                  |              |
| No. of person years            | 1,224,560 | 1,351,949        | 223,494          | 327,662          | 205,698          | 161,233          | 918,085          |              |
| No. of cases                   | 1,518     | 1,192            | 371              | 508              | 203              | 167              | 1,249            |              |
| Cases/person-years<br>(1/1000) | 1.24      | 0.88             | 1.66             | 1.55             | 0.99             | 1.04             | 1.36             |              |
| Model 1                        | 1.00      | 0.88 (0.81,0.96) | 0.81 (0.71,0.92) | 0.92 (0.81,1.04) | 0.91 (0.78,1.07) | 1.13 (0.95,1.35) | 0.90 (0.83,1.00) | 0.016        |
| Model 2                        | 1.00      | 0.94 (0.87,1.02) | 0.84 (0.74,0.96) | 0.96 (0.85,1.09) | 0.94 (0.80,1.10) | 1.10 (0.92,1.31) | 0.93 (0.85,1.03) | 0.097        |
| Model 3                        | 1.00      | 0.92 (0.85,1.00) | 0.81 (0.71,0.93) | 0.93 (0.82,1.05) | 0.89 (0.76,1.05) | 1.04 (0.87,1.24) | 0.90 (0.82,0.99) | 0.214        |

\* Multivariate models were adjusted for: model 1: age (years) and sex (male or female); model 2: additionally included level of education (no formal school, primary school, middle school, high school, college, or university or higher); marital status (married, widowed, divorced or separated, or never married); alcohol consumption (never; occasional; former and having quitted ≤2, 3-4, or ≥5 years; weekly consuming 1-286, 287-426, or ≥427 g of alcohol for men or 1-146, 147-286, or ≥287 g of alcohol for women); smoking status (never; occasional; former and having quitted ≤2, 3-4, 5-9, 10-19, or ≥20 years; current smoking 1-4, 5-9, 10-14,

---

15-19, 20-24, or  $\geq 25$  cigarettes/day); physical activity (MET h/day); intake frequencies of red meat, fruits, and vegetables (daily, 4 to 6 days/wk, 1 to 3 days/wk, monthly, or rarely or never); family history heart attack (presence, absence, or unknown); model 3: additionally included BMI; prevalent hypertension and diabetes at baseline (presence or absence).

† Tests for linear trend were only conducted in daily consumers by modeling the amount of tea consumption (in gram/day) as a variable in regression models.

**Supplemental Table 3 Subgroup analysis of associations between tea consumption and risk of IHD according to potential baseline risk factors. Values are HRs (95% CIs) unless stated otherwise. \***

| Subgroups                     | Never |      | Less than daily |                  | Daily |                  | <i>P</i> <sub>Interaction</sub> † |
|-------------------------------|-------|------|-----------------|------------------|-------|------------------|-----------------------------------|
|                               | No. ‡ | HR   | No. ‡           | HR (95% CI)      | No. ‡ | HR (95% CI)      |                                   |
| <b>IHD</b>                    |       |      |                 |                  |       |                  |                                   |
| Age at baseline               |       |      |                 |                  |       |                  | 0.280                             |
| <50 years                     | 1,745 | 1.00 | 2,048           | 0.98 (0.92,1.05) | 1,149 | 0.94 (0.86,1.03) |                                   |
| 50 to 59 years                | 3,116 | 1.00 | 2,767           | 0.98 (0.93,1.04) | 1,904 | 0.90 (0.84,0.97) |                                   |
| ≥60 years                     | 5,152 | 1.00 | 3,451           | 0.94 (0.90,0.99) | 3,333 | 0.91 (0.87,0.97) |                                   |
| Region                        |       |      |                 |                  |       |                  | 0.006                             |
| Urban                         | 4,950 | 1.00 | 4,368           | 0.99 (0.95,1.03) | 2,425 | 0.94 (0.89,1.00) |                                   |
| Rural                         | 5,063 | 1.00 | 3,898           | 0.93 (0.88,0.97) | 3,961 | 0.88 (0.83,0.93) |                                   |
| Alcohol consumption           |       |      |                 |                  |       |                  | 0.507                             |
| Less than weekly              | 9,303 | 1.00 | 6,996           | 0.95 (0.92,0.98) | 5,050 | 0.91 (0.87,0.95) |                                   |
| Weekly                        | 710   | 1.00 | 1,270           | 0.94 (0.85,1.03) | 1,336 | 0.89 (0.80,0.99) |                                   |
| Smoking status                |       |      |                 |                  |       |                  | 0.263                             |
| Not current                   | 8,522 | 1.00 | 5,953           | 0.96 (0.93,0.99) | 3,586 | 0.92 (0.87,0.96) |                                   |
| Current                       | 1,491 | 1.00 | 2,313           | 0.99 (0.92,1.06) | 2,800 | 0.93 (0.86,1.00) |                                   |
| Physical activity (MET h/day) |       |      |                 |                  |       |                  | 0.202                             |
| <12.29                        | 5,346 | 1.00 | 3,871           | 0.95 (0.91,1.00) | 3,155 | 0.88 (0.83,0.93) |                                   |
| 12.29 to <25.31               | 2,765 | 1.00 | 2,589           | 0.95 (0.89,1.00) | 1,963 | 0.94 (0.88,1.01) |                                   |
| ≥25.31                        | 1,902 | 1.00 | 1,806           | 1.02 (0.95,1.09) | 1,268 | 0.97 (0.89,1.05) |                                   |
| BMI (kg/m <sup>2</sup> )      |       |      |                 |                  |       |                  | 0.064                             |
| <24                           | 4,870 | 1.00 | 3,815           | 0.93 (0.89,0.98) | 3,465 | 0.89 (0.84,0.94) |                                   |
| ≥24                           | 5,143 | 1.00 | 4,451           | 1.00 (0.96,1.04) | 2,920 | 0.94 (0.89,1.00) |                                   |

| Subgroups                     | Never |      | Less than daily |                  | Daily |                  | <i>P</i> <sub>Interaction</sub> † |
|-------------------------------|-------|------|-----------------|------------------|-------|------------------|-----------------------------------|
|                               | No. ‡ | HR   | No. ‡           | HR (95%CI)       | No. ‡ | HR (95%CI)       |                                   |
| Hypertension                  |       |      |                 |                  |       |                  | 0.537                             |
| No                            | 4,506 | 1.00 | 4,088           | 0.98 (0.93,1.02) | 2,745 | 0.91 (0.85,0.96) |                                   |
| Yes                           | 5,507 | 1.00 | 4,178           | 0.95 (0.91,1.00) | 3,641 | 0.93 (0.88,0.98) |                                   |
| Diabetes                      |       |      |                 |                  |       |                  | 0.004                             |
| No                            | 8,854 | 1.00 | 7,327           | 0.96 (0.92,0.99) | 5,677 | 0.89 (0.86,0.93) |                                   |
| Yes                           | 1,159 | 1.00 | 939             | 1.04 (0.95,1.15) | 709   | 1.11 (0.99,1.25) |                                   |
| <b>MCE</b>                    |       |      |                 |                  |       |                  |                                   |
| Age at baseline               |       |      |                 |                  |       |                  | 0.302                             |
| <50 years                     | 130   | 1.00 | 200             | 1.03 (0.81,1.30) | 135   | 0.96 (0.72,1.29) |                                   |
| 50 to 59 years                | 315   | 1.00 | 283             | 0.80 (0.67,0.96) | 268   | 0.75 (0.61,0.92) |                                   |
| ≥60 years                     | 1,073 | 1.00 | 709             | 0.94 (0.85,1.05) | 846   | 0.95 (0.84,1.07) |                                   |
| Region                        |       |      |                 |                  |       |                  | <0.001                            |
| Urban                         | 593   | 1.00 | 546             | 1.00 (0.88,1.13) | 441   | 1.03 (0.89,1.20) |                                   |
| Rural                         | 925   | 1.00 | 646             | 0.84 (0.75,0.94) | 808   | 0.78 (0.68,0.88) |                                   |
| Alcohol consumption           |       |      |                 |                  |       |                  | 0.195                             |
| Less than weekly              | 1,413 | 1.00 | 1,014           | 0.91 (0.83,0.99) | 979   | 0.86 (0.78,0.96) |                                   |
| Weekly                        | 105   | 1.00 | 178             | 0.86 (0.67,1.11) | 270   | 0.99 (0.76,1.28) |                                   |
| Smoking status                |       |      |                 |                  |       |                  | 0.330                             |
| Not current                   | 1,154 | 1.00 | 722             | 0.95 (0.86,1.05) | 595   | 0.97 (0.86,1.11) |                                   |
| Current                       | 364   | 1.00 | 470             | 0.87 (0.74,1.01) | 654   | 0.83 (0.71,0.97) |                                   |
| Physical activity (MET h/day) |       |      |                 |                  |       |                  | 0.568                             |
| <12.29                        | 1,007 | 1.00 | 682             | 0.91 (0.82,1.02) | 725   | 0.87 (0.77,0.99) |                                   |
| 12.29 to <25.31               | 318   | 1.00 | 306             | 0.92 (0.78,1.10) | 344   | 0.99 (0.81,1.20) |                                   |
| ≥25.31                        | 193   | 1.00 | 204             | 0.96 (0.77,1.19) | 180   | 0.88 (0.69,1.13) |                                   |

| Subgroups                | Never |      | Less than daily |                  | Daily |                  | <i>P</i> <sub>Interaction</sub> † |
|--------------------------|-------|------|-----------------|------------------|-------|------------------|-----------------------------------|
|                          | No. ‡ | HR   | No. ‡           | HR (95%CI)       | No. ‡ | HR (95%CI)       |                                   |
| BMI (kg/m <sup>2</sup> ) |       |      |                 |                  |       |                  | 0.012                             |
| <24                      | 838   | 1.00 | 613             | 0.85 (0.75,0.95) | 742   | 0.81 (0.71,0.92) |                                   |
| ≥24                      | 680   | 1.00 | 579             | 1.00 (0.89,1.13) | 506   | 1.03 (0.89,1.19) |                                   |
| Hypertension             |       |      |                 |                  |       |                  | 0.199                             |
| No                       | 497   | 1.00 | 471             | 0.95 (0.82,1.09) | 469   | 0.90 (0.77,1.06) |                                   |
| Yes                      | 1,021 | 1.00 | 721             | 0.90 (0.81,1.00) | 780   | 0.90 (0.80,1.01) |                                   |
| Diabetes                 |       |      |                 |                  |       |                  | 0.864                             |
| No                       | 1,254 | 1.00 | 1,003           | 0.91 (0.83,1.00) | 1,075 | 0.87 (0.79,0.97) |                                   |
| Yes                      | 264   | 1.00 | 189             | 0.94 (0.77,1.16) | 174   | 1.03 (0.81,1.31) |                                   |

\* Multivariate hazard ratios are calculated using Cox proportional hazard model with adjustment for age (years), sex (male or female), level of education (no formal school, primary school, middle school, high school, college, or university or higher), marital status (married, widowed, divorced or separated, or never married), alcohol consumption (never; occasional; former and having quitted ≤2, 3-4, or ≥5 years; weekly consuming 1-286, 287-426, or ≥427 g of alcohol for men or 1-146, 147-286, or ≥287 g of alcohol for women), smoking status (never; occasional; former and having quitted ≤2, 3-4, 5-9, 10-19, or ≥20 years; current smoking 1-4, 5-9, 10-14, 15-19, 20-24, or ≥25 cigarettes/day), physical activity (MET h/day), intake frequencies of red meat, fruits, and vegetables (daily, 4 to 6 days/wk, 1 to 3 days/wk, monthly, or rarely or never), family history heart attack (presence, absence, or unknown), BMI, prevalent hypertension and diabetes at baseline (presence or absence).

† No. of IHD cases or MCEs.

‡ The tests for interaction were performed using likelihood ratio tests, which involved comparing models with and without cross product terms between the baseline stratifying variable and tea consumption as an ordinal variable.

**Supplemental Table 4 Sensitivity analysis of associations between tea consumption and risk of IHD. Values are HRs (95% CIs) unless stated otherwise. \***

| Endpoints  | Never | Less than daily  | Daily (cups/day) |                  |                  |                  | All              |
|------------|-------|------------------|------------------|------------------|------------------|------------------|------------------|
|            |       |                  | 1 - 2            | 3 - 4            | 5 - 6            | ≥7               |                  |
| <b>IHD</b> |       |                  |                  |                  |                  |                  |                  |
| Model 3    | 1.00  | 0.97 (0.94,1.00) | 0.92 (0.87,0.97) | 0.91 (0.85,0.98) | 0.92 (0.87,0.98) | 0.91 (0.86,0.97) | 0.92 (0.88,0.95) |
| Analysis a | 1.00  | 0.96 (0.93,0.99) | 0.92 (0.87,0.97) | 0.91 (0.85,0.98) | 0.92 (0.86,0.97) | 0.91 (0.85,0.96) | 0.91 (0.88,0.95) |
| Analysis b | 1.00  | 0.97 (0.94,1.00) | 0.92 (0.88,0.97) | 0.92 (0.86,0.98) | 0.92 (0.87,0.98) | 0.91 (0.86,0.97) | 0.92 (0.88,0.96) |
| Analysis c | 1.00  | 0.96 (0.93,0.99) | 0.92 (0.87,0.97) | 0.91 (0.85,0.98) | 0.92 (0.87,0.98) | 0.91 (0.85,0.96) | 0.91 (0.88,0.95) |
| Analysis d | 1.00  | 0.98 (0.94,1.01) | 0.93 (0.88,0.99) | 0.94 (0.87,1.01) | 0.96 (0.90,1.03) | 0.94 (0.88,1.01) | 0.94 (0.90,0.99) |
| Analysis e | 1.00  | 0.96 (0.92,0.99) | 0.90 (0.85,0.95) | 0.90 (0.84,0.97) | 0.90 (0.84,0.96) | 0.87 (0.82,0.93) | 0.89 (0.86,0.93) |
| Analysis f | 1.00  | 0.97 (0.94,1.00) | 0.93 (0.88,0.98) | 0.92 (0.86,0.99) | 0.93 (0.87,0.98) | 0.92 (0.86,0.97) | 0.92 (0.89,0.96) |
| <b>MCE</b> |       |                  |                  |                  |                  |                  |                  |
| Model 3    | 1.00  | 0.92 (0.85,1.00) | 0.83 (0.74,0.95) | 0.99 (0.85,1.15) | 0.87 (0.75,1.00) | 0.97 (0.84,1.11) | 0.90 (0.82,0.99) |
| Analysis a | 1.00  | 0.92 (0.84,1.00) | 0.83 (0.74,0.94) | 1.00 (0.86,1.16) | 0.87 (0.75,1.00) | 0.96 (0.84,1.11) | 0.90 (0.81,0.99) |
| Analysis b | 1.00  | 0.92 (0.85,1.00) | 0.84 (0.74,0.95) | 0.99 (0.85,1.15) | 0.87 (0.75,1.00) | 0.97 (0.84,1.11) | 0.90 (0.82,0.99) |
| Analysis c | 1.00  | 0.92 (0.84,1.00) | 0.83 (0.74,0.94) | 0.99 (0.85,1.15) | 0.86 (0.75,1.00) | 0.96 (0.84,1.11) | 0.90 (0.81,0.99) |
| Analysis d | 1.00  | 0.93 (0.85,1.02) | 0.85 (0.74,0.97) | 0.99 (0.84,1.17) | 0.88 (0.75,1.03) | 1.01 (0.86,1.17) | 0.92 (0.82,1.02) |
| Analysis e | 1.00  | 0.91 (0.83,1.00) | 0.80 (0.70,0.91) | 1.00 (0.85,1.17) | 0.85 (0.73,0.99) | 0.93 (0.80,1.08) | 0.87 (0.79,0.97) |
| Analysis f | 1.00  | 0.93 (0.86,1.01) | 0.85 (0.75,0.96) | 1.01 (0.86,1.17) | 0.88 (0.76,1.02) | 0.98 (0.85,1.13) | 0.91 (0.83,1.01) |

\* Sensitivity analysis was calculated based on multivariable-adjusted model 3.

Model 3 : adjust for age (years), sex (male or female), level of education (no formal school, primary school, middle school, high school, college, or university or higher), marital status (married, widowed, divorced or separated, or never married), alcohol consumption (never; occasional; former and having quitted ≤2, 3-4, or ≥5 years; weekly consuming 1-286, 287-426, or ≥427 g of alcohol for men or 1-146, 147-286, or ≥287 g of alcohol for women), smoking status (never; occasional;



---

former and having quitted  $\leq 2$ , 3-4, 5-9, 10-19, or  $\geq 20$  years; current smoking 1-4, 5-9, 10-14, 15-19, 20-24, or  $\geq 25$  cigarettes/day), physical activity (MET h/day), intake frequencies of red meat, fruits, and vegetables (daily, 4 to 6 days/wk, 1 to 3 days/wk, monthly, or rarely or never), family history heart attack (presence, absence, or unknown), BMI, prevalent hypertension and diabetes at baseline (presence or absence);

Analysis a: additional adjust for occupation (agriculture related workers, factory worker, administrator or manager, professional or technical, sales and service workers, retired, house wife or husband, self-employed, unemployed, or other or not stated) and household income (<2,500, 2,500-4,999, 5,000-9,999, 10,000-19,999, 20,000-34,999, or  $\geq 35,000$  yuan/year);

Analysis b: additional adjust for histories (presence or absence) of chronic hepatitis or cirrhosis, peptic ulcer, and gallstone or cholecystitis;

Analysis c: adjust for waist circumference instead of BMI;

Analysis d: exclude participants whose outcomes occurred during the first two years of follow-up;

Analysis e: exclude participants with prevalent diabetes at baseline;

Analysis f: exclude former tea consumers from the reference group (i.e., participants who never drank tea in the past 12 months).
